# Supplementary material for: Insights from Large-Scale Analysis of Long Term and Repeat Antibiotic Prescribing Pre and during the COVID-19 Pandemic Periods
Source: Preprints.org preprint supplement (doi:10.20944/preprints202303.0032.v1), 2023-03-02
Supplement: Supplementary file 1 [file supplementary]

# Supplementary Tables and Figures

Table S1. Demographic characteristics of patients prescribed non-repeat antibiotics

| Characteristic | January 2020 (pre-pandemic) cohort | | | January 2021 (pandemic) cohort | | | |
| --- | --- | --- | --- | --- | --- | --- | --- |
|  | **Population (n =** **19,375,208)** | **Prescribed non-repeated antibiotics**  **(n =** **1,095,824)** | **Prescribing per 1000** | **Population (n =** **19,545,285)** | **Prescribed non-repeated antibiotics**  **(n =** **835,065)** | **Prescribing per 1000** | **Percent change vs 2020** |
| **Age and sex** | | | | | | | |
| 18-29, Female | 1,789,887 (9.24) | 134,634 (12.29) | 75.22 | 1,768,295 (9.05) | 109,661 (13.13) | 62.02 | -17.55 |
| 18-29, Male | 1,801,657 (9.3) | 56,958 (5.2) | 31.61 | 1,787,078 (9.14) | 40,384 (4.84) | 22.60 | -28.52 |
| 30-39, Female | 1,683,962 (8.69) | 114,373 (10.44) | 67.92 | 1,707,559 (8.74) | 91,425 (10.95) | 53.54 | -21.17 |
| 30-39, Male | 1,732,184 (8.94) | 46,449 (4.24) | 26.82 | 1,756,215 (8.99) | 33,553 (4.02) | 19.11 | -28.75 |
| 40-49, Female | 1,526,149 (7.88) | 95,049 (8.67) | 62.28 | 1,530,997 (7.83) | 75,587 (9.05) | 49.37 | -20.73 |
| 40-49, Male | 1,620,217 (8.36) | 46,172 (4.21) | 28.50 | 1,629,425 (8.34) | 33,876 (4.06) | 20.79 | -27.05 |
| 50-59, Female | 1,635,345 (8.44) | 106,195 (9.69) | 64.94 | 1,654,637 (8.47) | 81,680 (9.78) | 49.36 | -23.98 |
| 50-59, Male | 1,686,327 (8.7) | 56,306 (5.14) | 33.39 | 1,705,162 (8.72) | 42,531 (5.09) | 24.94 | -25.30 |
| 60-69, Female | 1,305,184 (6.74) | 95,640 (8.73) | 73.28 | 1,331,364 (6.81) | 69,702 (8.35) | 52.35 | -28.55 |
| 60-69, Male | 1,281,804 (6.62) | 59,760 (5.45) | 46.62 | 1,310,721 (6.71) | 43,580 (5.22) | 33.25 | -28.68 |
| 70-79, Female | 1,090,670 (5.63) | 94,663 (8.64) | 86.79 | 1,116,918 (5.71) | 69,294 (8.3) | 62.04 | -28.52 |
| 70-79, Male | 992,394 (5.12) | 63,573 (5.8) | 64.06 | 1,014,499 (5.19) | 45,823 (5.49) | 45.17 | -29.49 |
| 80-120, Female | 725,149 (3.74) | 80,839 (7.38) | 111.48 | 725,407 (3.71) | 63,746 (7.63) | 87.88 | -21.17 |
| 80-120, Male | 504,279 (2.6) | 45,213 (4.13) | 89.66 | 507,008 (2.59) | 34,223 (4.1) | 67.50 | -24.71 |
| **Residence** | | | | | | | |
| Private home | 19,102,126 (98.59) | 1,066,974 (97.37) | 55.86 | 19,276,300 (98.62) | 811,003 (97.12) | 42.07 | -24.68 |
| Care home | 56,979 (0.29) | 10,339 (0.94) | 181.45 | 56,385 (0.29) | 9,105 (1.09) | 161.48 | -11.01 |
| Care or nursing home | 2,505 (0.01) | 454 (0.04) | 181.24 | 2,322 (0.01) | 375 (0.04) | 161.50 | -10.89 |
| Nursing home | 48,843 (0.25) | 8,827 (0.81) | 180.72 | 47,447 (0.24) | 7,734 (0.93) | 163.00 | -9.80 |
| Missing | 164,755 (0.85) | 9,230 (0.84) | 56.02 | 162,831 (0.83) | 6,848 (0.82) | 42.06 | -24.93 |
| **Ethnicity** | | | | | | | |
| British | 13,336,088 (68.83) | 874,819 (79.83) | 65.60 | 13,424,038 (68.68) | 674,871 (80.82) | 50.27 | -23.36 |
| African | 237,664 (1.23) | 9,023 (0.82) | 37.97 | 248,818 (1.27) | 6,745 (0.81) | 27.11 | -28.60 |
| Any other Asian background | 280,197 (1.45) | 10,930 (1) | 39.01 | 290,504 (1.49) | 8,201 (0.98) | 28.23 | -27.63 |
| Any other Black background | 88,421 (0.46) | 3,829 (0.35) | 43.30 | 93,335 (0.48) | 3,087 (0.37) | 33.07 | -23.62 |
| Any other Mixed background | 90,785 (0.47) | 3,923 (0.36) | 43.21 | 94,187 (0.48) | 3,122 (0.37) | 33.15 | -23.29 |
| Any other White background | 1,671,589 (8.63) | 64,806 (5.91) | 38.77 | 1,718,196 (8.79) | 46,065 (5.52) | 26.81 | -30.85 |
| Any other ethnic group | 304,982 (1.57) | 11,563 (1.06) | 37.91 | 320,839 (1.64) | 9,087 (1.09) | 28.32 | -25.30 |
| Bangladeshi | 85,337 (0.44) | 4,645 (0.42) | 54.43 | 89,091 (0.46) | 3,488 (0.42) | 39.15 | -28.07 |
| Caribbean | 105,798 (0.55) | 4,936 (0.45) | 46.65 | 106,382 (0.54) | 4,054 (0.49) | 38.11 | -18.32 |
| Chinese | 133,388 (0.69) | 2,325 (0.21) | 17.43 | 134,678 (0.69) | 1,403 (0.17) | 10.42 | -40.23 |
| Indian | 528,449 (2.73) | 23,344 (2.13) | 44.17 | 547,831 (2.8) | 16,128 (1.93) | 29.44 | -33.36 |
| Irish | 102,020 (0.53) | 6,488 (0.59) | 63.60 | 102,812 (0.53) | 5,029 (0.6) | 48.91 | -23.08 |
| Pakistani | 372,857 (1.92) | 23,068 (2.11) | 61.87 | 385,318 (1.97) | 17,869 (2.14) | 46.37 | -25.04 |
| White and Asian | 45,869 (0.24) | 2,119 (0.19) | 46.20 | 48,185 (0.25) | 1,643 (0.2) | 34.10 | -26.19 |
| White and Black African | 42,435 (0.22) | 1,840 (0.17) | 43.36 | 44,412 (0.23) | 1,423 (0.17) | 32.04 | -26.11 |
| White and Black Caribbean | 53,562 (0.28) | 3,014 (0.28) | 56.27 | 55,520 (0.28) | 2,628 (0.31) | 47.33 | -15.88 |
| Missing | 1,895,767 (9.78) | 45,152 (4.12) | 23.82 | 1,841,139 (9.42) | 30,222 (3.62) | 16.41 | -31.08 |
| **Index of Multiple Deprivation (IMD) quintile** | | | | | | | |
| 1 | 3,688,616 (19.04) | 224,189 (20.46) | 60.78 | 3,708,065 (18.97) | 175,373 (21) | 47.30 | -22.18 |
| 2 | 3,806,589 (19.65) | 216,195 (19.73) | 56.79 | 3,827,052 (19.58) | 166,545 (19.94) | 43.52 | -23.38 |
| 3 | 4,113,190 (21.23) | 229,326 (20.93) | 55.75 | 4,133,488 (21.15) | 173,933 (20.83) | 42.08 | -24.53 |
| 4 | 3,861,551 (19.93) | 213,073 (19.44) | 55.18 | 3,883,672 (19.87) | 158,955 (19.04) | 40.93 | -25.82 |
| 5 | 3,529,411 (18.22) | 190,812 (17.41) | 54.06 | 3,548,646 (18.16) | 139,983 (16.76) | 39.45 | -27.04 |
| Missing | 375,851 (1.94) | 22,229 (2.03) | 59.14 | 444,362 (2.27) | 20,276 (2.43) | 45.63 | -22.85 |
| **Region** | | | | | | | |
| London | 1,370,757 (7.07) | 49,413 (4.51) | 36.05 | 1,401,485 (7.17) | 38,806 (4.65) | 27.69 | -23.19 |
| East | 4,473,416 (23.09) | 261,134 (23.83) | 58.37 | 4,524,344 (23.15) | 195,634 (23.43) | 43.24 | -25.93 |
| East Midlands | 3,346,011 (17.27) | 190,942 (17.42) | 57.07 | 3,368,011 (17.23) | 141,999 (17) | 42.16 | -26.12 |
| North East | 924,774 (4.77) | 54,707 (4.99) | 59.16 | 928,030 (4.75) | 39,970 (4.79) | 43.07 | -27.19 |
| North West | 1,695,187 (8.75) | 104,227 (9.51) | 61.48 | 1,706,464 (8.73) | 83,188 (9.96) | 48.75 | -20.71 |
| South East | 1,316,373 (6.79) | 74,325 (6.78) | 56.46 | 1,323,206 (6.77) | 56,771 (6.8) | 42.90 | -24.01 |
| South West | 2,701,539 (13.94) | 149,984 (13.69) | 55.52 | 2,726,547 (13.95) | 114,471 (13.71) | 41.98 | -24.38 |
| West Midlands | 777,478 (4.01) | 42,906 (3.92) | 55.19 | 778,032 (3.98) | 32,810 (3.93) | 42.17 | -23.58 |
| Yorkshire and The Humber | 2,760,064 (14.25) | 167,543 (15.29) | 60.70 | 2,778,667 (14.22) | 130,883 (15.67) | 47.10 | -22.40 |
| Missing | 9,609 (0.05) | 643 (0.06) | 66.92 | 10,499 (0.05) | 533 (0.06) | 50.77 | -24.13 |

Table shows N (%) for total population, population prescribed repeat antibiotics, population prescribed non-repeat antibiotics, in January 2020 and January 2021. The rate of antibiotic prescribing is calculated per 1000, and percent change in the rate of antibiotic prescribing is calculated for January 2021 vs January 2020


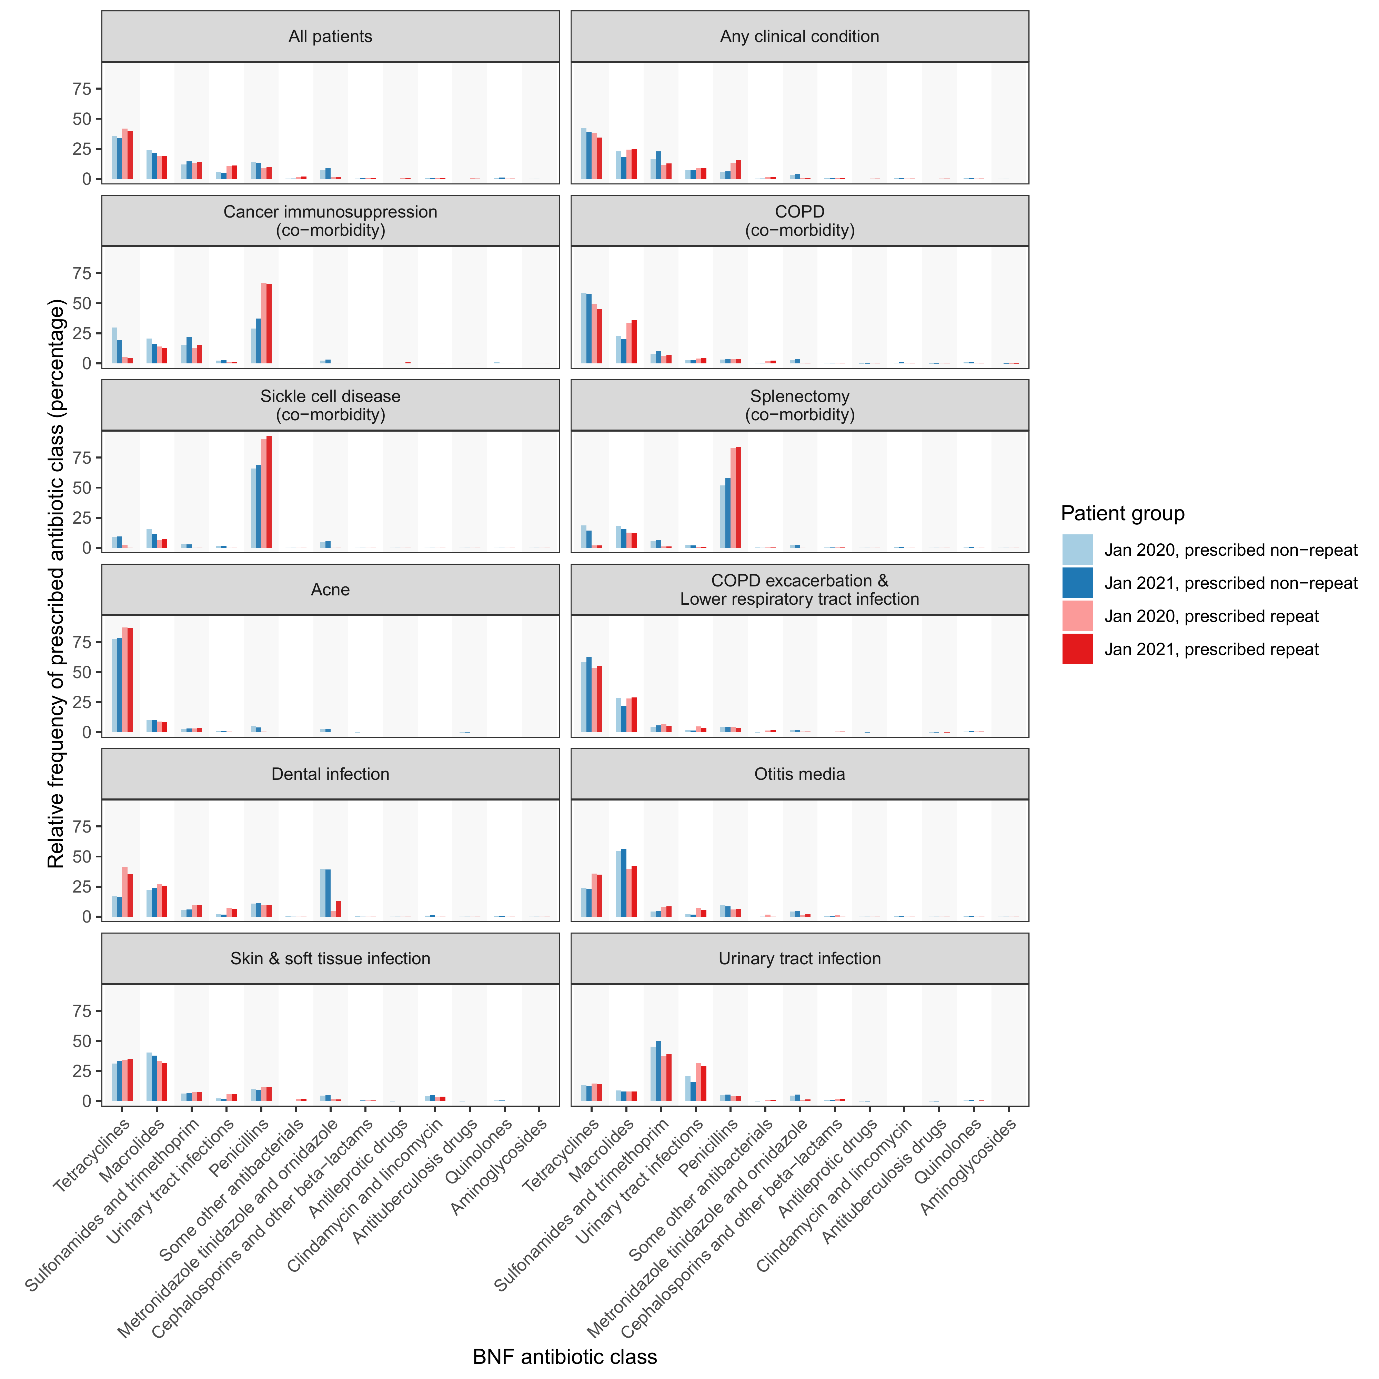


Figure S1. The relative frequency of prescribed antibiotic classes is shown as a percentage of total patients within each patient group, broken down by patient clinical condition. Patient groups represent repeated and non-repeated prescribing of a given antibiotic class in January 2020 and 2021 cohorts. Antibiotic classes are ordered by frequency of prescribing among the January 2021 repeated prescribed group, among ‘All patients’ (from most frequent [tetracyclines] to least frequent [aminoglycosides]).


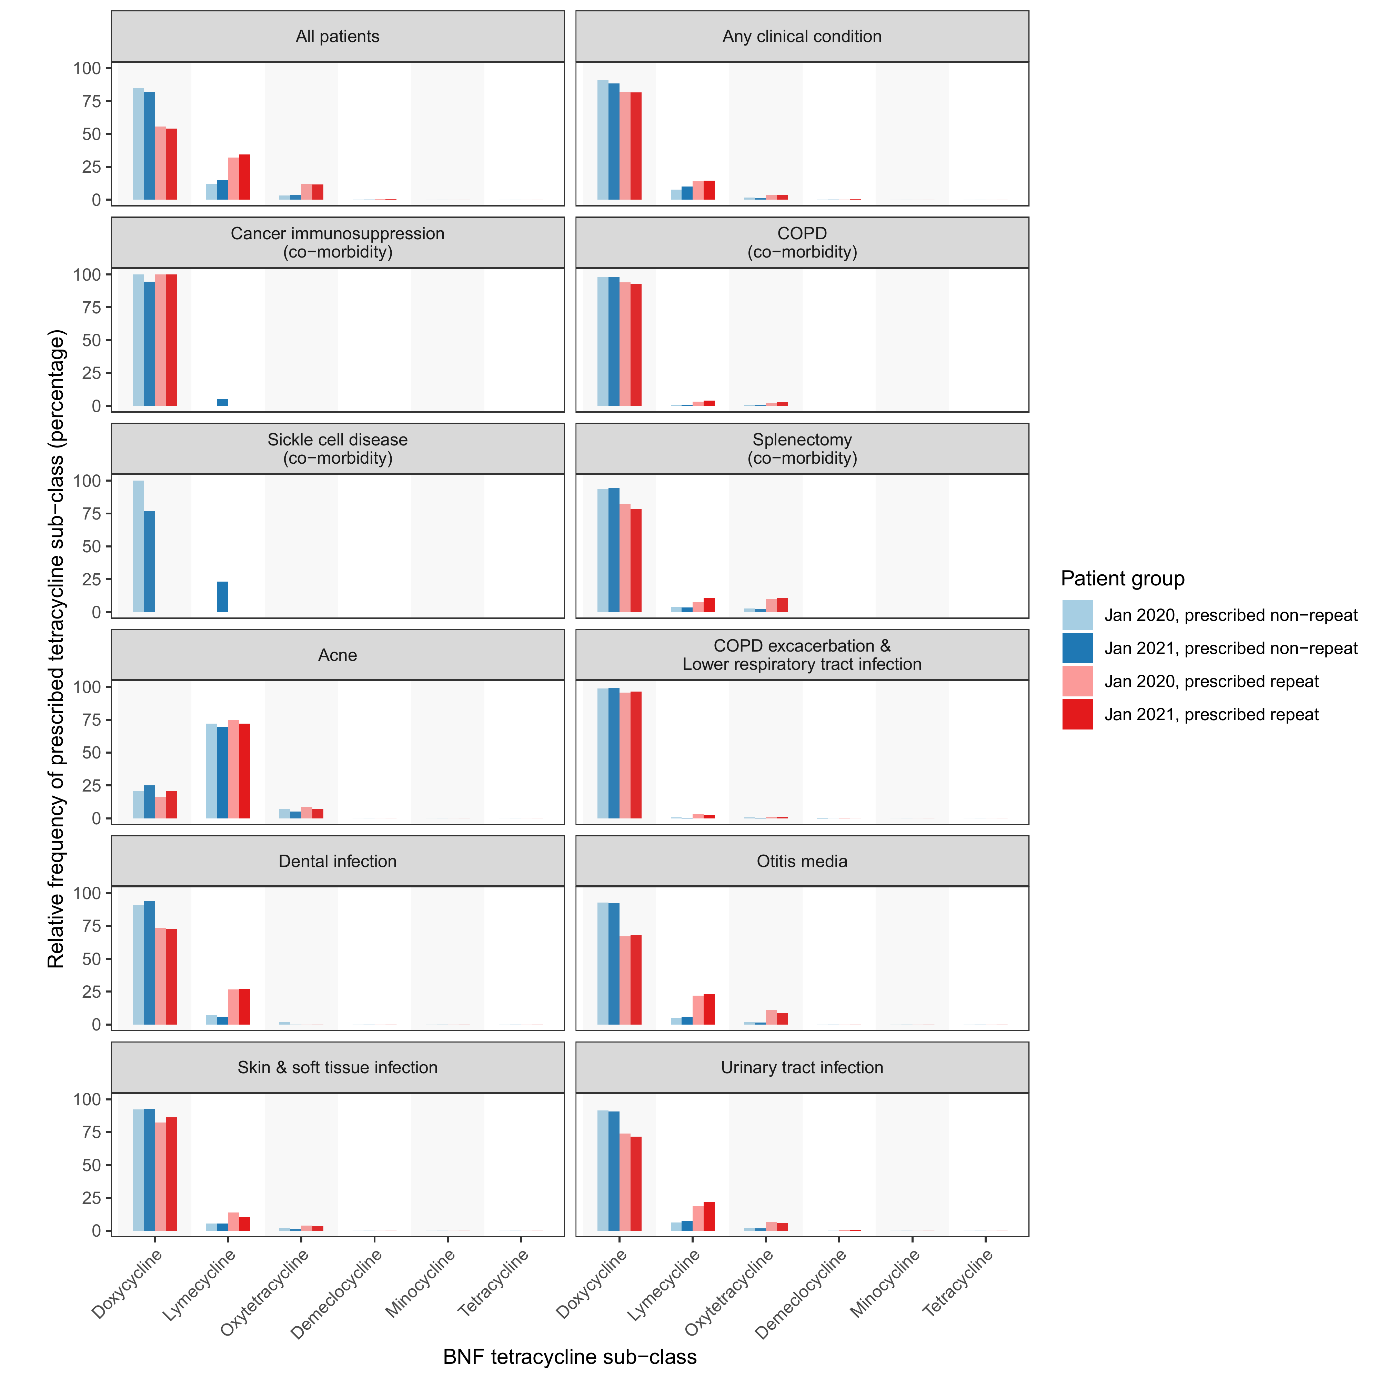


Figure S2. The relative frequency of prescribed tetracycline sub-classes is shown as a percentage of total patients within each patient group, broken down by patient clinical condition. Patient groups represent repeated and non-repeated prescribing of a given antibiotic class in January 2020 and 2021 cohorts. Tetracycline sub-classes are ordered by frequency of prescribing among the January 2021 repeated prescribed group, among ‘All patients’ (from most frequent [doxycycline] to least frequent [tetracycline]).
